# Supplementary material
Source: PubMed Central journal article supplement (PMC9227706)
Supplement: jamaoncol-e222228-s00.pdf [file jamaoncol-e222228-s00.pdf]

## Data Sharing Statement

Stein. Efficacy of Ipilimumab vs FOLFOX in Combination With Nivolumab and Trastuzumab in Patients With Previously Untreated ERBB2-Positive Esophagogastric Adenocarcinoma. *JAMA Oncol.* Published June 23, 2022. doi:10.1001/jamaoncol.2022.2228

### Data

**Data available:** No
